# Supplementary material for: Calmodulin-like protein AtCML3 mediates dimerization of peroxisomal processing protease AtDEG15 and contributes to normal peroxisome metabolism
Source: PubMed Central journal article supplement (PMC3830196; doi:10.1007/s11103-013-0112-6), 2013-08-14
Supplement: 11103_2013_112_MOESM1_ESM.pdf [file 11103_2013_112_MOESM1_ESM.pdf]

**A**



**B**



**Figure S1.** AtDEG15 interacts with AtCML3 through its N-terminal 25 amino acids. Interaction assay using Y2H was tested by cloning the full-length coding regions of *AtDEG15* and its truncated variants and also *AtCML3* into pBridge and pGAD424, fusing them with the DNA-binding domain or with the DNA-activation domain, respectively, and tested for interaction in both combinations. As negative controls a combination of empty vectors and vectors harbouring one of the constructs were used. (A) Growth on His-free medium (-His) indicates interaction by transcription of the His3-reporter; (+His), positive growth control. Negative controls are shaded in grey. Yeast cultures were diluted from  $10^5$  cells (left) to  $10^1$  cells (right) per 50  $\mu$ l drop applied. (B) Interaction is also demonstrated by transcription of the lacZ reporter ( $\beta$ -gal activity in Miller units). Mean (n=3) +/- SD. Inlay: Schematic representation of AtDEG15 and the various deletion constructs used in A and B: green, AtCML3 binding domain; red, protease domain with plant-specific loop; blue, PTS1.



**Figure S2.** Binding of AtDEG15 to CaM via its N-terminal domain was confirmed by affinity chromatography on CaM-agarose. (A and B): AtDEG15 was purified from inclusion bodies using 4 M urea and incubated with CaM-agarose in the presence (0.1 mM CaCl<sub>2</sub>) or absence of Ca<sup>2+</sup> (5mM EGTA/EDTA). Bound protein was eluted with either bovine CaM (A) or purified recombinant AtCML3 (B). (C): Affinity chromatography on CaM-agarose using AtDEG15 purified under native conditions. AtDEG15 bound specifically to the matrix in the presence but not in the absence of Ca<sup>2+</sup>, and could be eluted with bovine CaM. (D): DEG15\_N comprising only the first 327 amino acids without the protease and C-terminal domains is still able to bind to calmodulin-agarose in a calcium-dependent manner.



**Figure S3.** Recombinant expression of soluble AtDEG15 yields the full length protein consistently accompanied by various degradation products. AtDEG15 with an N-terminal His-tag and an N-terminal “Xpress epitope” permitting detection of the recombinant fusion protein by appropriate antibodies was expressed in *E.coli* under control of an arabinose-inducible promoter. The protein was purified by HisTrap affinity chromatography under native conditions. Analysis of all fractions by SDS-PAGE and Coomassie staining (A) or Westernblot (B) revealed the full length AtDEG15 protein (76 kDa) as well as varying degradation products probably due to self cleavage.



**Figure S4.** Recombinant enzymatically active full length AtDEG15 exhibits the characteristics of the monomer as a general protease with an intrinsic self-cleavage activity. (A) His-tagged purified AtDEG15 comprising full length protein and C-terminally truncated degradation products was incubated over night at 4°C before affinity chromatography on CaM-agarose under native conditions in the presence (0.1 mM CaCl<sub>2</sub>) and absence of Ca<sup>2+</sup> (5mM EGTA/EDTA). Purified AtDEG15 incubated overnight as well as the different fractions of the affinity chromatography on CaM-agarose were analyzed by SDS-PAGE and Coomassie staining. AtDEG15 full length protein together with its C-terminally truncated versions bound specifically to the matrix in the presence of Ca<sup>2+</sup> and could be eluted with bovine CaM, but not in the absence of Ca<sup>2+</sup> (5mM EGTA/EDTA), whereas N-terminally truncated versions could not bind to the CaM-ligand. (B) The AtDEG15\_N-terminus lacking the protease domain was stable under these experimental conditions and also bound to the CaM-agarose in a calcium-dependent fashion..



**Figure S5.** Western Blot analysis of yeast AH109 cells expressing the full-length AtDeg15 and the AtDeg15 $\Delta$ 25aa variant with antibodies directed against the binding domain in pBRIDGE [GAL4 (DBD) (RK5C1) Santa Cruz Biotechnology] show immuno-reactive bands of the expected size in both strains and not in the untransformed yeast AH109 used as a negative control.



**Figure S6.** Crosslinking of a synthetic AtDEG15 peptide with CaM. Crosslinking experiments were performed using a synthetic peptide comprising the first 21 amino acids of AtDEG15 (H<sub>2</sub>N - MDVSKVVSFSRNFAVLVKVEG - CONH<sub>2</sub>) and either CaM (A) or egg ovalbumin (B). A cross-linking product between CaM and the peptide can be observed solely in the presence of calcium. No cross-linking product occurs when CaM is replaced by egg albumin.







protease domain
plant specific loop within protease domain
protease domain

Ath\_DEG15 -----ASIPAQVAIEKAMESVCLITVNDGVAASGILLDEHG-----LILITNAHLLEPWRFRGKGGVYEG-----FKPFPV-LGADEFSSGQ-SKFWGKQST-LPRKAPRHHYSVGENIREYKHFLOTHGRRDIRVRLCHLDSWTCBANVVICKEQDIALLOLEYVPG  
 Aly\_DEG15 -----TSIPAQVAIEKAMESVCLITVNDGVAASGILLDEHG-----LILITNAHLLEPWRFRGKGGVYEGNDAGLKPV-LGADDEFSSGQ-GKFWGKQST-LPRKAPRHHYSVGENIREYKHFLOTHGRRDIRVRLCHLDSWTCBANVVICKEQDIALLOLEYVPG  
 Rco\_DEG15 **HE**SG**DF**SP**YK**Y**EH**FN**SG**CS**ST**LP**VE**KV**MA**S**CL**IT**DE**GI**VA**S**G**ILL**DG**Q-----LVLITNAHLLEPWRFRGKTTINGSGRRN**K**SGALF-LPP**EG**V**LP**PG**HE**VD**SY**SG**SQ**-----MPLNKA**K**IM**D**S**V**GT**ED**T**GD**Q**D**LS**S**SG**H**R**R**IR**V**RL**CH**L**D**S**W**T**C**B**A**N**V**V**I**C**K**E**Q**D**I**A**L**L**O**L**E**Y**V**P**D**  
 Maes\_DEG15 **HE**SG**DF**SL**CF**EV**EL**K**TY**C**SS**L**PE**V**KA**S**CL**IT**DE**GI**VA**S**G**ILL**DG**Q-----LILITNAHLLEPWRFRGKTTASGGRRN**SE**AVF-LL**PE**ES**DF**SG**Y**SV**D**M**H**K**K**SL**R**-F**Q**PE**A**W**R**NS**I**L**V**D**H**S**K**Y**Q**L**N**L**S**W**K**G**H**R**IR**V**R**L**D**V**M**P**W**I**W**C**A**K**V**V**V**S**G**K**G**L**D**V**A**L**L**O**L**E**Y**V**D**  
 Potr\_DEG15 **SS**SD**GF**PF**LK**EH**HS**IC**SS**PP**VE**K**A**M**S**IC**L**IT**DE**L**V**W**A**S**G**ILL**DG**Q-----LILITNAHLLEPWRFRGKTTASGGED**Q**KL**Q**DFP-IP**PE**-----P**FR**Y**EV**D**S**HK**ET**Q**R**-L**PP**K**Y**L**N**I**M**S**V**A**D**E**S**K**V**L**S**W**K**G**H**R**IR**V**R**L**D**V**M**P**W**I**W**C**A**K**V**V**V**S**G**K**G**L**D**V**A**L**L**O**L**E**Y**V**D**  
 Prpe\_DEG15 **HD**SN**GF**IT**HI**Q**EH**L**Y**SN**CS**SP**HE**K**A**I**G**S**CL**IT**DE**L**V**W**A**S**G**ILL**DG**Q-----LILITNAHLLEPWRFRGKTTAS**D**G**K**H**S**NS**E**-----A**L**S**D**S**P**V**S**P**R**SE**Y**S**T**SE**Y**SG**H**R**IR**V**R**L**D**V**M**P**W**I**W**C**A**K**V**V**V**S**G**K**G**L**D**V**A**L**L**O**L**E**Y**V**D**  
 Sly\_DEG15 **SI**Q**DF**PN**IT**Q**EH**L**Y**SG**SV**PL**TE**K**A**M**S**IC**L**IT**DE**V**D**G**A**S**G**ILL**DG**Q-----LILITNAHLLEPWRFRGKTT**SV**NGG-----Y**N**I**K**S**D**V**V**F-**SH**SN**DE**Q**DF**K**Y**H**R**R**NI**-**FL**Q**R**I**R**N**H**A**L**D**V**F**GD**E**Y**SG**H**R**IR**V**R**L**D**V**M**P**W**I**W**C**A**K**V**V**V**S**G**K**G**L**D**V**A**L**L**O**L**E**Y**V**D**  
 Cusa\_DEG15 **Q**K**LE**GG**FS**SI**ES**CS**SP**FP**FK**LE**K**A**S**V**CL**IT**DE**GI**VA**S**G**ILL**DG**Q-----LILITNAHLLEPWRFRGKTT**SV**NGG-----Y**N**I**K**S**D**V**V**F-**SH**SN**DE**Q**DF**K**Y**H**R**R**NI**-**FL**Q**R**I**R**N**H**A**L**D**V**F**GD**E**Y**SG**H**R**IR**V**R**L**D**V**M**P**W**I**W**C**A**K**V**V**V**S**G**K**G**L**D**V**A**L**L**O**L**E**Y**V**D**  
 Glma\_DEG15 **D**K**L**V**CS**R**N**K**EH**L**Y**FG**SS**PL**TE**K**A**M**S**V**CL**IT**DE**GI**VA**S**G**ILL**DG**Q-----LILITNAHLLEPWRFRGK**HE**Y**GG**Y**Q**NS**E**K**IS**-**S**M**LE**SG**A**V**V**V**N**-**R**V**ES**N**Q**V**S**Q**T**-**S**L**K**M**P**L**Y**F**A**N**E**Q**GG**Y**K**SS**P**T**D**N**R**R**I**R**V**R**L**D**H**I**K**S**W**V**D**C**A**K**V**V**V**S**G**K**G**L**D**V**A**L**L**O**L**E**Y**V**D**  
 Migu\_DEG15 -----K**D**R**L**I**Q**P**Q**V**S**-----I**E**D**A**M**S**IC**L**IT**DE**S**D**G**A**S**G**ILL**DG**Q-----LILITNAHLLEPWRFRG**TA**N-----A**G**Y**Q**L**M**C**H**T**H**R**R**IR**V**R**L**D**V**M**P**W**I**W**C**A**K**V**V**V**S**G**K**G**L**D**V**A**L**L**O**L**E**I**V**P**H**  
 Vvi\_DEG15a **HD**SG**DF**PN**SM**Q**DF**CC**SP**PL**SL**TE**K**A**M**S**IC**L**T**DE**GI**VA**S**G**ILL**D**G**Q-----LILITNAHLLEPWRFRG**TA**N**Y**ARG**GC**RA**GE**PE**TF**P-IP**SE**EV**Y**CR**DE**GT**Y**SH**Q**K**S**D-LL**P**K**Y**L**N**I**M**S**V**A**D**E**S**K**V**L**S**W**K**G**H**R**IR**V**R**L**D**V**M**P**W**I**W**C**A**K**V**V**V**S**G**K**G**L**D**V**A**L**L**O**L**E**Y**V**D**  
 Vvi\_DEG15b -----A**Q**P**D**CC**SP**PL**SL**TE**K**A**M**S**IC**L**T**DE**GI**VA**S**G**ILL**D**G**Q-----LILITNAHLLEPWRFRG**TA**N-----Q**D**F**ST**Y**R**G**H**R**R**IR**V**R**L**D**V**M**P**W**I**W**C**A**K**V**V**V**S**G**K**G**L**D**V**A**L**L**O**L**E**F**V**P**G**  
 Sobl\_DEG15 **Y**G**R**-----F**V**SS**M**V**N**K**I**N**Q**H**C**IS**PS**L**R**E**A**IS**AV**V**L**V**T**Y**S**DS**W**AS**G**I**L**V**L**K**R**G-----LVLITNAHLLEPWRFRG**TA**N**Y**ARG**GC**RA**GE**PE**TF**P-----A**S**F**AG**E**H**L**N**A**G**E**N**K-----S**Q**O**P**E-----G**K**F**S**N**E**D**A**V**H**N**H**V**L**F**N**L**G**F**K**R**E**R**I**S**V**R**L**D**H**A**E**R**Q**I**C**N**A**S**V**V**T**IS**RG**L**D**V**A**L**L**O**L**E**D**R**V**I**P**  
 Zema\_DEG15 **Y**V**R**-----F**V**SS**T**D**N**K**I**N**Q**H**C**IS**PS**L**R**E**A**IS**AV**V**L**V**T**Y**S**DS**W**AS**G**I**L**V**L**K**R**G-----LVLITNAHLLEPWRFRG**TA**N**Y**ARG**GC**RA**GE**PE**TF**P-----A**S**F**AG**E**H**L**N**A**G**E**N**K-----S**Q**O**P**E-----G**K**F**S**N**E**D**A**V**H**N**H**V**L**F**N**L**G**F**K**R**E**R**I**S**V**R**L**D**H**A**E**R**Q**I**C**N**A**S**V**V**T**IS**RG**L**D**V**A**L**L**O**L**E**R**V**P**V  
 Orsa\_DEG15 **H**R**R**-----F**V**PS**N**S**A**N**L**N**Q**H**C**IS**PS**L**R**E**A**IS**AV**V**L**V**T**Y**S**DS**W**AS**G**I**L**V**L**K**R**G-----LVLITNAHLLEPWRFRG**TA**N**Y**ARG**GC**RA**GE**PE**TF**P-----K**T**AS**F**S-----E**H**I**C**G**G**E**N**N-----L**L**O**P**Q**Q**K**V**S**N**E**D**A**V**H**K**H**E**L**S**F**N**L**G**L**K**D**R**A**I**S**V**R**L**D**H**G**E**R**K**I**C**N**A**S**V**V**T**IS**RG**L**D**V**A**L**L**O**L**E**M**K**E**P**I**  
 Seit\_DEG15 **Y**G**R**-----F**V**SS**T**V**N**K**I**N**Q**H**C**IS**PS**L**R**E**A**IS**AV**V**L**V**T**Y**S**DS**W**AS**G**I**L**V**L**K**R**G-----LVLITNAHLLEPWRFRG**TA**N**Y**ARG**GC**RA**GE**PE**TF**P-----T**S**AG**E**V**L**S**A**R**EN**R-----S**L**O**P**Q**Q**K**F**S**N**D**A**V**K**H**E**V**S**L**F**N**L**G**F**K**R**E**R**I**S**V**R**L**D**H**A**E**R**Q**I**C**N**A**S**V**V**T**IS**RG**L**D**V**A**L**L**O**L**E**M**E**V**P**I  
 Brdi\_DEG15 **Y**G**R**-----S**V**S**I**S**A**N**H**N**Q**H**C**IS**PS**L**R**E**A**IS**AV**V**L**V**T**Y**S**DS**W**AS**G**I**L**V**L**K**R**G-----LVLITNAHLLEPWRFRG**TA**N**Y**ARG**GC**RA**GE**PE**TF**P-----E**T**IS**L**Q**EH**V**R**E**V**E**N**-L**L**O**S**Q**E**C**K**S**N**Q**D**A**V**K**H**E**A**L**F**N**L**G**F**K**R**E**R**I**S**V**R**L**D**H**G**K**R**I**C**N**A**S**V**V**T**IS**RG**L**D**V**A**L**L**O**L**E**M**A**V**I  
 Phpa\_DEG15 **Q**R**C**R**PS**IS**ES**HT**Y**Q**A**M**Q**V**PS**A**V**R**A**V**S**V**L**IT**IG**D**G**A**S**G**I**L**V**L**K**T**G**-----LILITNAHLLEPWRFRG**TA**N**Y**ARG**GC**RA**GE**PE**TF**P-----S**T**P**K**D**S**G**F**L**S**C**D**E**Q**L**A**L**N**-----Q**L**O**E**ES**I**S**K**G**V**S**T**R**SS**V**TD**V**S**Q**K**Y**R**I**R**V**R**L**D**H**R**Q**PS**W**H**A**R**V**P**V**S**Q**GP**L**D**V**A**L**L**O**L**E**SS**P**P**  
 Popa\_DEG15 -----P**L**IS**N**S**V**L**S**V**S**Q**DF**Q**LS**L**SL**D**R**Q**K**H**N**I**V**L**V**K**F**D**T**W**GS**G**V**L**S**SS**G**-----Y**L**IT**NA**H**L**I**P**S**I**S**T**A**L**H**N**S**D**S**N**A**V**-----Y**P**A**M**F**K**D**V**R**V**E**I**R**D**V**A**A**L**G-----K**E**T**I**G**H**M**Y**G**R**E**I**S**T**H**L**D**L**A**L**L**K**V**C**D**S**  
 Didi\_DEG15 -----K**V**R**L**S**N**S**L**S**V**S**Q**DF**Q**LS**SL**D**R**Q**K**H**N**I**V**L**V**K**F**D**T**W**GS**G**V**L**S**SS**G**-----Y**L**IT**NA**H**L**I**P**S**I**S**T**A**L**H**N**S**D**S**N**A**V**-----Y**P**A**M**F**K**D**V**R**V**E**I**R**D**V**A**A**L**G-----K**E**T**I**G**H**M**Y**G**R**E**I**S**T**H**L**D**L**A**L**L**K**V**C**D**S**  
 Dare\_DEG15 -----T**G**V**S**Q**L**V**N**G**S**L**Q**A**P**L-----M**A**R**R**S**G**L**E**L**Y**P**G**V**L**V**E**T**G**W**L**W**GS**G**V**L**L**N**Q**N-----L**V**L**T**C**R**H**V**D**E**K**S**E**L**T**V**K**V**N**S**G**G**R-----S**S**I**E**L**Y**K**D**K**V**C**H**L**R**I**S**S**N**S**I**L**M**N**S**G**S**S**L**H**Q**S**S**S**S**F**I**W**K**T**G**E**I**S**T**H**L**D**L**A**L**L**K**D**O**S**I**L**L**N**D**O**K**K**H**P  
 Brf1\_DEG15 -----W**L**L**P**A**A**A**V**H**I**S**T**Q**EP**H**A**L**S**Q**VE**K**S**I**V**N**I**E**A**G**E**I**W**GS**G**V**V**H**V**D**E**K**V**L**L**C**R**H**V**I**G**-----F**S**E**K**V**K**V**M**C**H**A**R**-----F**H**T**V**R**G**K**V**L**S**V**S**V**P**D**I**A**V**L**E**Q**A**  
 HmaTYSD1 -----A**A**L**A**A**L**L**P**-----F**V**G**V**P**W**L**GL**L**R**D**S**G**L**P**W**A**A**A**V**L**VE**C**G**T**V**W**GS**G**V**A**V**A**P**R-----L**V**V**T**C**R**H**V**S**P**R**E**A**A**R**V**L**V**R**S**T**PK**-----S**V**A**I**G**R**V**V**F**A**Q**ET**C**P**V**D**I**A**V**S**L**E**E**D**  
 Mmu\_DEG15 -----A**S**L**S**V**L**L**P**P**D**V**T**Q**R**L**GL**P**W**A**A**A**V**L**VE**C**G**T**V**W**GS**G**V**V**A**P**R**-----L**V**V**T**C**R**H**V**S**P**R**E**A**A**R**V**L**V**S**A**T**PK**-----N**V**A**I**G**Q**V**V**F**A**Q**ET**C**P**V**D**I**A**V**S**L**E**E  
 Ath\_DEG1 -----I**D**A**P**K**N**L**R**P**I**P**V**G**S**A**D**L**L**V**G**Q**V**F**A**I**G**N**P**F**L**D**H**L**L**I**G**V**I**S**G**-----L**R**R**E**I**S**S**A**T**GR**P**I**Q**D**V**I**Q**D**A**L**N**P**G**S**G**GP**L**L**D**S**  
 Ath\_DEG2 -----L**G**V**L**L**Q**K**E**N**P**A**R**E**C**L**K**V**P**T**N**-----E**G**V**L**V**R**R**V**E**P**S**D**A**S**K**V**L**K**E**G**D-----V**I**V**S**F**D**L**L**H**G**C**E**G**T**P**P**R**S**E**R**I**A**F**R**N**L**S**Y**K**F**A**G**  
 Ath\_DEG3 -----I**N**L**T**Y**Q**K**M**D**N**D**Q**L**R**K**D**F**K**M**S**D**K**M**T**G**I**L**I**N**K**I**N**P**L**S**D**V**H**K**V**L**K**D**D**-----I**L**A**D**D**V**I**G**N**D**S**V**H**R**K**K**E**R**I**T**F**K**L**V**S**M**K**K**P**C**  
 Ath\_DEG4 -----L**D**I**S**Y**Q**L**M**E**N**S**Q**R**N**H**F**K**M**G**P**E**T**G**I**L**I**N**K**I**N**P**L**S**D**A**V**K**R**L**K**R**D**D-----I**L**A**D**D**V**I**G**N**D**A**K**V**T**R**N**K**E**R**I**N**F**N**H**V**S**M**K**K**D**  
 Ath\_DEG5 -----I**E**T**E**G**R**E**L**N**P**V**V**L**G**T**S**N**D**L**R**V**G**Q**S**C**F**A**I**G**N**P**Y**G**E**N**L**L**I**G**V**S**G**-----L**R**E**I**P**S**P**N**-----G**K**S**I**S**E**A**L**Q**T**D**A**D**I**N**G**S**GP**L**L**D**S**  
 Ath\_DEG6 -----M**E**T**I**T**V**L**R**D**FG**A**T**A**S**A**N**A**S**L**A**E**R**A**I**E**P**A**L**V**N**F**EV**H**V**P**P**S**CL**D**G**V**S**H**Q**F**T**G**I**L**I**V**S**S**N**M**L**Q**AV**V**D**K**N**T**V**A**I**S**A**S**D**V**M**L**S**F**A**A**F**P**V**E**I**P**GE**V**V**L**H**P**V**H**N**Y**A**L**L**A**V**N**P**S**A**M**D**P**A**S**A**S**V**I**R**A**A**E**L**L**P**E**A**L**Q**R**S**D**EV**L**V**Q**L**R**N**L**Q**A**S**R**K**S**I**V**N**P**C**A**A**L**N**G**S**A**D**S**P**R**A**N**R**E**M**V**I**L**D**D**FG**S**S**F**SG**  
 Ath\_DEG7 -----A**S**S**S**S**R**Q**N**K**R**P**V**N**R**T**D**E**F**N**K**L**D**D**V**E**K**L**H**V**E**M**E**T**T**N-----V**S**E**N**D**Q**O**Q**F**VE**P**L**P**PH**O**S**T**PK**D**C**E**R**V**S**-----I**L**S**F**D**G**V**I**A**N**D**G**T**P**P**R**H**G**E**R**I**F**S**Y**L**S**I**K**T**G**  
 Ath\_DEG8 -----L**G**I**E**W**K**M**E**N**P**D**L**R**K**S**M**S**E**S**Q**K**G**V**R**I**R**R**E**P**T**A**P**E**S**Q**V**L**K**P**S**D-----I**L**L**A**D**G**V**I**A**N**D**G**T**P**P**R**R**E**R**I**T**F**D**S**I**L**S**M**K**K**P**D**  
 Ath\_DEG9 -----M**G**V**S**C**P**M**E**N**G**E**L**R**S**F**Q**M**S**E**N**T**G**V**L**S**K**I**N**P**L**S**D**A**H**K**L**L**K**D**D**-----I**L**L**A**D**G**V**I**A**N**D**G**T**P**P**R**R**E**R**I**T**F**D**S**I**L**S**M**K**K**P**D**  
 Ath\_DEG10 -----L**D**L**S**Y**Q**L**E**N**V**Q**I**R**N**H**F**K**M**S**HE**M**T**G**I**L**I**N**K**I**N**S**S**S**G**A**K**L**I**R**K**D**D**-----I**L**L**A**D**G**V**I**A**N**D**E**K**V**P**K**R**R**I**D**F**S**Y**L**V**S**M**K**K**P**  
 Ath\_DEG11 -----L**V**L**S**C**S**E**M**K**N**A**Q**I**R**N**H**F**K**M**S**P**E**T**G**I**L**I**N**K**I**N**S**S**S**G**A**H**K**L**I**R**K**D**D**-----I**L**L**A**D**G**V**P**V-----L**S**E**M**R**S**I**F**N**H**I**S**M**K**K**P**  
 At\_DEG12 -----L**N**L**S**Y**Q**L**H**D**A**-----A**D**R**S**H**F**K**M**S**E**N**T**G**I**L**I**N**K**I**N**S**S**S**G**A**L**N**I**K**Y**D-----V**I**L**S**I**D**G**V**A**I**E**N**D**G**T**V**I**P**N**C**R**E**R**I**R**L**D**D**V**L**S**L**K**L**G-----S**L**P**N**L  
 At\_DEG13 -----L**N**L**S**Y**Q**L**H**D**A**-----A**D**R**S**H**F**K**M**S**E**N**T**G**I**L**I**N**K**I**N**S**S**S**G**A**L**N**I**K**Y**D-----V**I**L**S**I**D**G**V**A**I**E**N**D**G**T**V**I**P**N**C**R**E**R**I**R**L**D**D**V**L**S**L**K**L**G-----S**L**P**N**L  
 Ath\_DEG14 -----I**K**S**T**P**L**P**A**K**L**G**F**S**S**L**R**P**D**W**I**A**V**C**L**S**L**Q**ET**W**I**A**G**I**V**S**C**-----V**D**R**K**S**D**L**G**G**K**R**E**L**Q**T**C**S**I**N**A**G**S**G**GP**L**V**N-----  
 Ath\_DEG16 -----

protease domain

Ath\_DEG15 -----K**L**Q**P**I**T**A**N**F**S**S**P**P**L**G**T**A**H**V**V**G**H**L**G**F**P**R**C**L**S**P**S**I**C**S**G**V**A**K**V**H**A**K**R**K**L**N**T**Q**S**I**S**Q**E**V**A**-----E**F**F**A**M**L**E**T**A**A**V**H**P**GG**S**G**A**V**L**N**S-----G**H**M**I**G**L**V**T**S**N**A**R**H-----S**A**G**T**V**I**P**H**L**N**F**S**I**P**C**A**V**L**A**P**I**F**K**F**A**E**D-----M**Q**N**E**I**L**Q**T**L**D**-----Q**P**S**E**L**L**S**I**A**L**M**P**S**L**S**P**K**E**-----Q**S**L  
 Aly\_DEG15 -----K**L**Q**P**I**A**A**N**F**S**S**P**P**L**G**T**A**H**V**V**G**H**L**G**F**P**R**C**L**S**P**S**I**C**S**G**V**A**K**V**H**A**K**R**K**L**N**T**Q**S**I**S**Q**E**V**A**-----E**F**F**A**M**L**E**T**A**A**V**H**P**GG**S**G**A**V**L**N**S-----G**H**M**I**G**L**V**T**S**N**A**R**H-----S**A**G**T**V**I**P**H**L**N**F**S**I**P**C**A**V**L**A**P**I**F**K**F**A**E**D-----M**Q**N**E**I**L**Q**T**L**D**-----Q**P**S**E**L**L**S**I**A**L**M**P**S**L**S**P**K**E**-----Q**S**L  
 Rco\_DEG15 -----Q**L**C**P**K**A**D**I**A**C**P**L**G**S**K**A**Y**V**I**G**H**L**G**F**P**R**C**L**S**P**S**I**C**S**G**V**A**K**V**H**A**K**E**A**P**P**Y**Q**I**S**Q**E**V**A**-----H**I**P**A**M**L**E**T**A**A**V**H**P**GG**S**G**A**V**L**N**S-----G**H**M**I**G**L**V**T**S**N**A**R**H-----G**G**G**T**V**I**P**H**L**N**F**S**I**P**C**A**L**L**A**P**I**F**E**F**A**R**D-----T**K**I**S**L**L**Q**T**L**D**-----R**P**N**Q**L**S**S**V**A**L**M**P**S**L**S**H**K**P**S-----P**P**L  
 Maes\_DEG15 **Q**L**C**P**K**I**M**D**I**A**C**P**L**G**S**K**A**Y**V**I**G**H**L**G**F**P**R**C**L**S**P**S**I**C**S**G**V**A**K**V**H**A**K**E**A**P**P**Y**Q**I**S**Q**E**V**A**-----H**I**P**A**M**L**E**T**A**A**V**H**P**GG**S**G**A**V**L**N**S-----G**H**M**I**G**L**V**T**S**N**A**R**H-----G**G**G**T**V**I**P**H**L**N**F**S**I**P**C**A**L**L**A**P**I**F**E**F**A**R**D-----M**Q**D**I**L**S**L**L**Q**T**L**D**-----L**P**N**Q**L**S**S**V**A**L**M**P**S**L**S**P**K**P**S-----P**H**L  
 Potr\_DEG15 **Q**L**F**P**K**I**M**D**I**A**C**P**L**G**S**K**A**Y**V**I**G**H**L**G**F**P**R**C**L**S**P**S**I**C**S**G**V**A**K**V**H**A**K**A**P**Y**Q**I**S**Q**E**V**A**-----H**I**P**A**M**L**E**T**A**A**V**H**P**GG**S**G**A**V**L**N**S-----G**H**M**I**G**L**V**T**S**N**A**R**H-----G**G**G**T**V**I**P**H**L**N**F**S**I**P**C**A**L**L**A**P**I**F**E**F**A**R**D-----M**R**D**I**S**L**Q**T**L**D**-----R**P**N**Q**L**S**S**V**A**L**M**P**S**L**S**P**K**P**S-----P**P**L  
 Prpe\_DEG15 **H**L**S**P**L**A**K**D**F**S**S**P**S**V**G**S**K**A**Y**V**I**G**H**L**G**F**P**R**C**L**S**P**S**I**C**S**G**V**A**K**V**H**A**K**F**L**S**Q**PN**Q**P**N**Q**-----G**H**F**P**V**M**L**E**T**A</**



**Figure S7.** Sequence alignment of peroxisomal processing proteases from plants, animals and cellular slime molds and of DEG proteases in Arabidopsis used for construction of the phylogenetic tree (Fig. 7). The **CaM-binding domain** at the N-terminus of DEG15 from dicots and monocots (also boxed in red within the sequences), the **protease domain** in the plant, animal and cellular slime mold DEG15 with their catalytic triade His, Asp and Ser (\*), the **plant specific loop within the protease domain** and the **PTS1** at the C-terminus are indicated above the sequences. Amino acids conserved among the sequences are coloured according to the *Clustal X Colour Scheme*: orange, G; yellow, P; green, T, S, N, Q; blue, W, L, V, I, M, A, F; cyan: H, Y; magenta: E, D; red: K, R. For accession numbers see supplemental Tab. S2A. Sequence alignments were obtained by ClustalX 2.0 [Thompson JD, Gibson TJ, Plewniak F, Jeanmougin F, Higgins DG (1997) The CLUSTAL\_X windows interface: flexible strategies for multiple sequence alignment aided by quality analysis tools. *Nucleic Acids Res* 25:4876-4882] and phylogenetic tree construction was performed by maximum likelihood using tree-puzzle-5.2 [Strimmer K, von Haeseler A (1996) Quartet puzzling: A quartet maximum-likelihood method for reconstructing tree topologies. *Mol Biol Evol* 13:964-969].

**Figure S8: Amino acids of the entire beta-casein sequence (224 aa) including the pre-sequence (amino acid residues 1-15) and the mature beta-casein (amino acid residues 16-224) with the AtDEG15 cleavage sites indicated by arrows.**

MKVLILACLVALALA-  
 RELEELNVPGEIVESLSSEESITRINKKIEKFQSEEQQQTEDELQDKIHFFAQTQSLVYFFPGPIPNSLPQNIP  
 PLTQTPVVVPPFLQPEVMGVSKVKEAMAPKHKEMPPKYPVEPFTESQSLTLT↓DVENLHLPLPLLQS↓W↓M↓HQ  
 PHQPLPPTVM↓FPPQ↓S↓VLSLSQSKVLPVPQKAVPYPQRDMPIQAFLL↓YQEPV↓LGPVR↓GPFPIIV

**Beta-casein peptides obtained by cleavage with recombinant AtDEG15**

| aa-position beta-casein | peptide sequence       |
|-------------------------|------------------------|
| 144-157                 | T↓DVENLHLPLPLLQS↓W     |
| 159-171                 | W↓MHQPHQPLPPTVM↓F      |
| 159-176                 | W↓MHQPHQPLPPTVMFPPQS↓V |
| 160-171                 | M↓HQPHQPLPPTVM↓F       |
| 160-175                 | M↓HQPHQPLPPTVMFPPQ↓S   |
| 160-176                 | M↓HQPHQPLPPTVMFPPQS↓V  |
| 208-217                 | L↓YQEPV↓LGPVR↓G        |
| 213-224 C-term          | V↓LGPVRGPFPIIV.-       |

**Figure S9.** *Dictyostelium discoideum* DEG15. XP\_641938: The protein sequence as it is published in the database contains long repeat regions of N, Q and S that don't match the other cellular slime mold *Polysphondylium pallidum* DEG15 and would cause long gaps in the alignment of DEG proteins (Fig. S4). DiDi\_DEG15: Protein sequence without the long repeat regions of N, Q and S as it was used for the alignment of DEG proteins.

>XP\_641938

```
MVNNFSSNGSDFINNINNNNNNNNSNNNSNNNNYNSNKFNLEEERIIPNLRRSCCIVRVSGIDQSNGTNPNLQSTR
SRSFSYSSNGKIIIFSCSGFILDLEKGLIITSPTIFLPPFILQQQNDNKRNNNNNNNNNNNNNNNQMTESNITKNT
KNSIEKILSLINIDIILESDIINIRNNVNEENNNNDYSDDKIYDPVNSWRSCKFIDYLSCSQKTINTLNQLKNHF
ILSNQSSGFESSFGLIVLEINDKSSLIINQQQQQQRQQIEHQHQHQHQHQQQRINSSVIGNSVDVRSNGNSVYVVG
SPFGFISPTMFLNSISNGIVCNCIQSSSSSSSSFLIDARSLPGNEGSGVFNKDGLLIGFIAPPPIRSKNDKLPFT
LSPVLPPIHSLPRIESQLSIYPKYRLSNLSVSCFDPIQQSVNDCQNSIVLVQFKNSWGSGLVISESGYILTNAH
LIIPSIPLIQQQIQQQQQQQQQQQQQQQQQQQQQTNQTKQTKSSQQQQQQQQQQQQPQPFPIELYKDKKVDLRI
SSNSIINNQQSSSLHQSSNSFFIWCKGTIEYISHTHLDIALIKIDQHDLSILLNDNNNNNNNNNNNNNNNNNN
NNNNNNNNNNNNNNNNNNNNNNNNNNNNNNNNQKKHEPIKFQHVICNPILNPKYGESVFLGYPLIPPTQNPPI
SVTKGII SNIVYVDNCAVSYQTTASVHSGNSGGGLFDLKGFLGIVTCNAKQKNGLIITELNFSIPATSLIHFFHYANGTDE
MGLNLMRSTSTDKFLKALWKLQITPPPLSNTNKNINNTNTNNNNNNNNNNNNNNNNNNNNNNNNNNNNNNI
STSTSP IAGKK
YSEFLT KMNQQQQQDNNNKIQSKL
```

>DiDi\_DEG15

```
MVNNFSSNGSDFIYNYSNKFNLEEERIIPNLRRSCCIVRVSGIDQSNGTNPNLQSTRSRSFSYSSNGKIIIFSCSGF
ILDLEKGLIITSPTIFLPPFILQQQNDNKRNNIMTESNITKNTKNSIEKILSLINIDIILESDIINIRNNVNEDYSD
DKIYDPVNSWRSCKFIDYLSCSQKTINTLNQLKNHFILSNQSSGFESSFGLIVLEINDKSSLIINRQQIEHQHQ
HRINSSVIGNSVDVRSNGNSVYVVGSPFGFISPTMFLNSISNGIVCNCIQLFLIDARSLPGNEGSGVFNKDGLL
GFIAPPPIRSKNDKLPFTLSPVLPPIHSLPRIESQLSIYPKYRLSNLSVSCFDPIQQSVNDCQNSIVLVQFKNSW
GSGVLVISESGYILTNAHLIIPSIPLITNQTQTKQTKSSPQPFPIELYKDKKVDLRISSNSIINNQQSSSLHQSSNS
FIWCKGTIEYISHTHLDIALIKIDQHDLSILLNDQKKHEPIKFQHVICNPILNPKYGESVFLGYPLIPPTQNP
ISVTKGII SNIVYVDNCAVSYQTTASVHSGNSGGGLFDLKGFLGIVTCNAKQKNGLIITELNFSIPATSLIHFF
HYANGTDEMGLNLMRSTSTDKFLKALWKLQITPPPLSNTNKNINNTNTISTSTSP IAGKKYSEFLT KMNNDNNNKI
QSKL
```

**Table S1. List of primers used in this study**

| <b>Primer name</b>  | <b>5'-3' sequence</b>                              |
|---------------------|----------------------------------------------------|
| Y2HDEG15fw          | ACGTACGAATTCATGGATGTGTCTAAAG                       |
| Y2HDEG15rev         | TGCATCGTCGACAGGGATCACATC                           |
| Y2HDEG15Δ1/3N fw    | TCGATCGAATTCAGTAGTAGTATCTCTC                       |
| Y2HDEG15Δ2/3N fw    | TCGATCGAATTCGTCCCCTTAAGTTTAC                       |
| Y2HDEG15ΔN fw       | TCGATCGAATTCGCACAAGTGGCTATTG                       |
| Y2HDEG15N rev       | AGCTAGGTCGACAACACCATCATTG                          |
| Y2HDEG15ΔC rev      | AGCTAGGTCGACTCAGGTGCCAAGACTGC                      |
| Y2HDEG15Δ25AS fw    | GCATCGAATTCATGTTGAAGATGAGGAAGCATGC                 |
| Y2HDEG15Δ50AS fw    | GCATCGAATTCATGCCAAGAGATATTTTTTTGAG                 |
| Y2HDEG15Δ75AS fw    | GCATCGAATTCATGTTGACCGTTGCATCTGTTG                  |
| Y2HDEG15Δ100AS fw   | GCATCGAATTCATGGTGAAGCTTATCCGGGTGC                  |
| Y2HCAM fw           | ACGTACGAATTCATGGATCAAGCGGAGC                       |
| Y2HCAM rev          | TGCATGGTCGACTCCTAAGGCGGC                           |
| Y3HCAM fw           | AAGGTGGCGCCGCATGGATCAAGCGGAGCTTGC                  |
| Y3HCAM rev          | CCCGAAGATCTTTACAAGTTTGATCCTAAGGCG                  |
| pETDEG15fw          | CGATCGATCGAATCTGGATGTGTCTAAAGTTGTCAGC              |
| pETDEG15rev         | CCTAGCTCGAGTCATAACTTGCTAGGGATCACATCACG             |
| pETDEG15Δ1/3N fw    | CGATCGATCGAATTCAGTAGTAGTATCTCTCAGGATCCGG           |
| pETDEG15Δ2/3N fw    | CGATCGATCGAATTCGTCCCCTTAAGTTTACTGGGTCAACC          |
| pETDEG15ΔN fw       | CGATCGATCGAATCTGGGCTTCTGGTATTATTCTTAACG            |
| pETDEG15Δloop fw    | CACCTCAGGAGCTCCTCAAGCAGGTGAGCATTTG                 |
| pETDEG15Δloop rev   | CGATCGATCGAGCTCGGGCATAGAGACATACGTGTGCG             |
| pETDEG15ΔC rev      | CTCAGCTCGAGTCATAACTTGCTACATGGGATGCTGAAGTTGAGATGCGG |
| pETCML3 fw          | ATCGATCGAATTCATGGATCAAGCGGAGCTTGC                  |
| pETCML3 rev         | CCTAGGTCGACCAAGTTTGATCCTAAGG                       |
| pCAMBIA fw          | CGATCGATCAGATCTATGGGCAGCAGCCATCATCATC              |
| pCAMBIA ΔC rev      | CCTCAGCACGTGCTCGAGTCATAACTTGCTAGGGATC              |
| pCAMBIA rev         | CCTCAGCACGTGCTCGAGTCATAACTTGCTACATGG               |
| pCAMBIA CML3-bd fw  | ACTGACCATGGACATGGATGTGTCTAAAG                      |
| pCAMBIA CML3-bd rev | TCAGTAGATCTAACTTTGGATCAGGGCC                       |

fw, forward; rev, reverse.

**Table S2A: DEG proteases from plants, animals and cellular slime molds for alignment (Fig. S7) and phylogenetic tree ( Fig. 7)**

| Denotation    | Organism                        | Accession-Nr.               | Localization     | Domain-structure                              |
|---------------|---------------------------------|-----------------------------|------------------|-----------------------------------------------|
| Ath_DEG15     | <i>Arabidopsis thaliana</i>     | NP_174153                   | SKL (peroxisome) | no PDZ-domain                                 |
| Aly_DEG15     | <i>Arabidopsis lyrata</i>       | XP_002893523                | SKL (peroxisome) | no PDZ-domain                                 |
| Rco_DEG15     | <i>Ricinus communis</i>         | XP_002509448                | SKL (peroxisome) | no PDZ-domain                                 |
| Potr_DEG15    | <i>Populus trichocarpa</i>      | XP_002305124/POPTR_4s04650  | SKL (peroxisome) | no PDZ-domain                                 |
| Cusa_DEG15    | <i>Cucumis sativus</i>          | Cucsa046320                 | SKL (peroxisome) | no PDZ-domain                                 |
| Glma_DEG15    | <i>Glycine max</i>              | Glyma13g31080               | SKL (peroxisome) | no PDZ-domain                                 |
| Migu_DEG15    | <i>Mimulus guttatus</i>         | mgf007197                   | SKL (peroxisome) | no PDZ-domain                                 |
| Prpe_DEG15    | <i>Prunus persica</i>           | ppa001854                   | SKL (peroxisome) | no PDZ-domain                                 |
| Maes_DEG15    | <i>Manihot esculenta</i>        | 4.1_003779m + 4.1_018442m.g | SKL (peroxisome) | no PDZ-domain                                 |
| Vvia_DEG15    | <i>Vitis vinifera</i>           | XP_002273997                | SKL (peroxisome) | no PDZ-domain                                 |
| Vvib_DEG15    | <i>Vitis vinifera</i>           | CBI30593                    | SKL (peroxisome) | no PDZ-domain                                 |
| Sobi_DEG15    | <i>Sorghum bicolor</i>          | XP_002441322                | SKI (peroxisome) | no PDZ-domain                                 |
| Zema_DEG15    | <i>Zea mays</i>                 | GRMZM2G162699               | SKI (peroxisome) | no PDZ-domain                                 |
| Orsa_DEG15    | <i>Oryza sativa</i>             | EEE64231                    | SKI (peroxisome) | no PDZ-domain                                 |
| Seit_DEG15    | <i>Setaria italica</i>          | SiPROV003192                | SKM (peroxisome) | no PDZ-domain                                 |
| Brdi_DEG15    | <i>Brachypodium distachyon</i>  | Bradi2g21020                | SKI (peroxisome) | no PDZ-domain                                 |
| Phpa_DEG15    | <i>Physcomitrella patens</i>    | XP_001775762                | SRL (peroxisome) | no PDZ-domain                                 |
| Popa_DEG15    | <i>Polysphondylium pallidum</i> | EFA82668                    | AKL (peroxisome) | no PDZ-domain                                 |
| Didi_DEG15    | <i>Dictyostelium discoideum</i> | XP_641938                   | SKL (peroxisome) | no PDZ-domain                                 |
| Darer_NP_001  | <i>Danio rerio</i>              | XP_690168                   | SKL (peroxisome) | no PDZ-domain                                 |
| Brfl_DEG15    | <i>Branchyostome floridae</i>   | XP_002609926                | SKI (peroxisome) | no PDZ-domain                                 |
| HsaTYSND1     | <i>Homo sapiens</i>             | NM_173555                   | SKL (peroxisome) | no PDZ-domain                                 |
| Mumu_NP082188 | <i>Mus musculus</i>             | XP_125636 XP_002509448      | SKL (peroxisome) | no PDZ-domain                                 |
| Ath_DEG1      | <i>Arabidopsis thaliana</i>     | XM_002667490                | chloroplasts     | 1 PDZ-domain                                  |
| Ath_DEG2      | <i>Arabidopsis thaliana</i>     | AF245171                    | chloroplasts     | 1 PDZ-domain, elongated C-terminus            |
| Ath_DEG3      | <i>Arabidopsis thaliana</i>     | NM_105236                   | mitochondria     | 1 PDZ-domain, elongated C-terminus            |
| Ath_DEG4      | <i>Arabidopsis thaliana</i>     | NM_105237                   | mitochondria     | 1 PDZ-domain, elongated C-terminus            |
| Ath_DEG5      | <i>Arabidopsis thaliana</i>     | NM_117947                   | chloroplasts     | truncated, no PDZ-domain                      |
| Ath_DEG6      | <i>Arabidopsis thaliana</i>     | NM_103994                   | chloroplasts     | no PDZ-domain                                 |
| Ath_DEG7      | <i>Arabidopsis thaliana</i>     | NM_111209                   | nucleus (?)      | 2 protease-domains (1 inactiv), 4 PDZ-domains |
| Ath_DEG8      | <i>Arabidopsis thaliana</i>     | NM_123346                   | chloroplasts     | 1 PDZ-domain                                  |
| Ath_DEG9      | <i>Arabidopsis thaliana</i>     | NM_123384                   | chloroplasts     | 1 PDZ-domain, elongated C-terminus            |
| Ath_DEG10     | <i>Arabidopsis thaliana</i>     | NM_123053                   | mitochondria     | 1 PDZ-domain, elongated C-terminus            |
| Ath_DEG11     | <i>Arabidopsis thaliana</i>     | NM_112526                   | mitochondria     | 1 PDZ-domain, elongated C-terminus            |
| Ath_DEG12     | <i>Arabidopsis thaliana</i>     | NM_112527                   | mitochondria     | 1 PDZ-domain, elongated C-terminus            |
| Ath_DEG13     | <i>Arabidopsis thaliana</i>     | NM_123420                   | unknown          | 1 PDZ-domain, elongated C-terminus            |
| Ath_DEG14     | <i>Arabidopsis thaliana</i>     | NM_122648                   | mitochondria     | 1 PDZ-domain                                  |
| Ath_DEG16     | <i>Arabidopsis thaliana</i>     | NM_148132                   | chloroplasts     | 1 PDZ-domain, elongated C-terminus            |

**Table S2B: DEG15 proteases from plants (truncated sequences) and peroxisomal proteases from green algae**

| <b>Denotation</b> | <b>Organism</b>                      | <b>Accession-Nr.</b>      | <b>encoded protein</b> | <b>catalytic aa</b> | <b>PTS1</b> |
|-------------------|--------------------------------------|---------------------------|------------------------|---------------------|-------------|
| Metr_DEG15        | <i>Medicago trunculata</i>           | Medtr2g017690             | 608 aa                 | His-Asp-Ser         | truncated   |
| Metr_DEG15        | <i>Medicago trunculata</i>           | Medtr2g017700             | 194 aa                 | truncated           | truncated   |
| Aqco_DEG15        | <i>Aquilegia coerulea</i>            | AcoGoldSmith_v1.004744m.g | 461 aa                 | His-Asp-Ser         | SKL         |
| Capa_DEG15        | <i>Carica papaya</i>                 | evm.TU.supercontig_373.8  | 502 aa                 | His-Asp-Ser         | SKL         |
| Potr_DEG15        | <i>Populus trichocarpa</i>           | POPTR_0011s05510          | 729 aa                 | His-Asp-Ser         | SKL         |
|                   | <i>Volvox carteri f. nagariensis</i> | XP002956349               | 1088 aa                | Asp-Ser             | SRL         |
|                   | <i>Micromonas sp. RCC299</i>         | XP002505560               | 708 aa                 | Asp-Ser             | SKL         |
